# Supplementary material
Source: Springer Nature journal article supplement (https://www.springermedizin.de/resource/supplementary/12936_2009_1203_MOESM5_ESM.pdf/9549204)

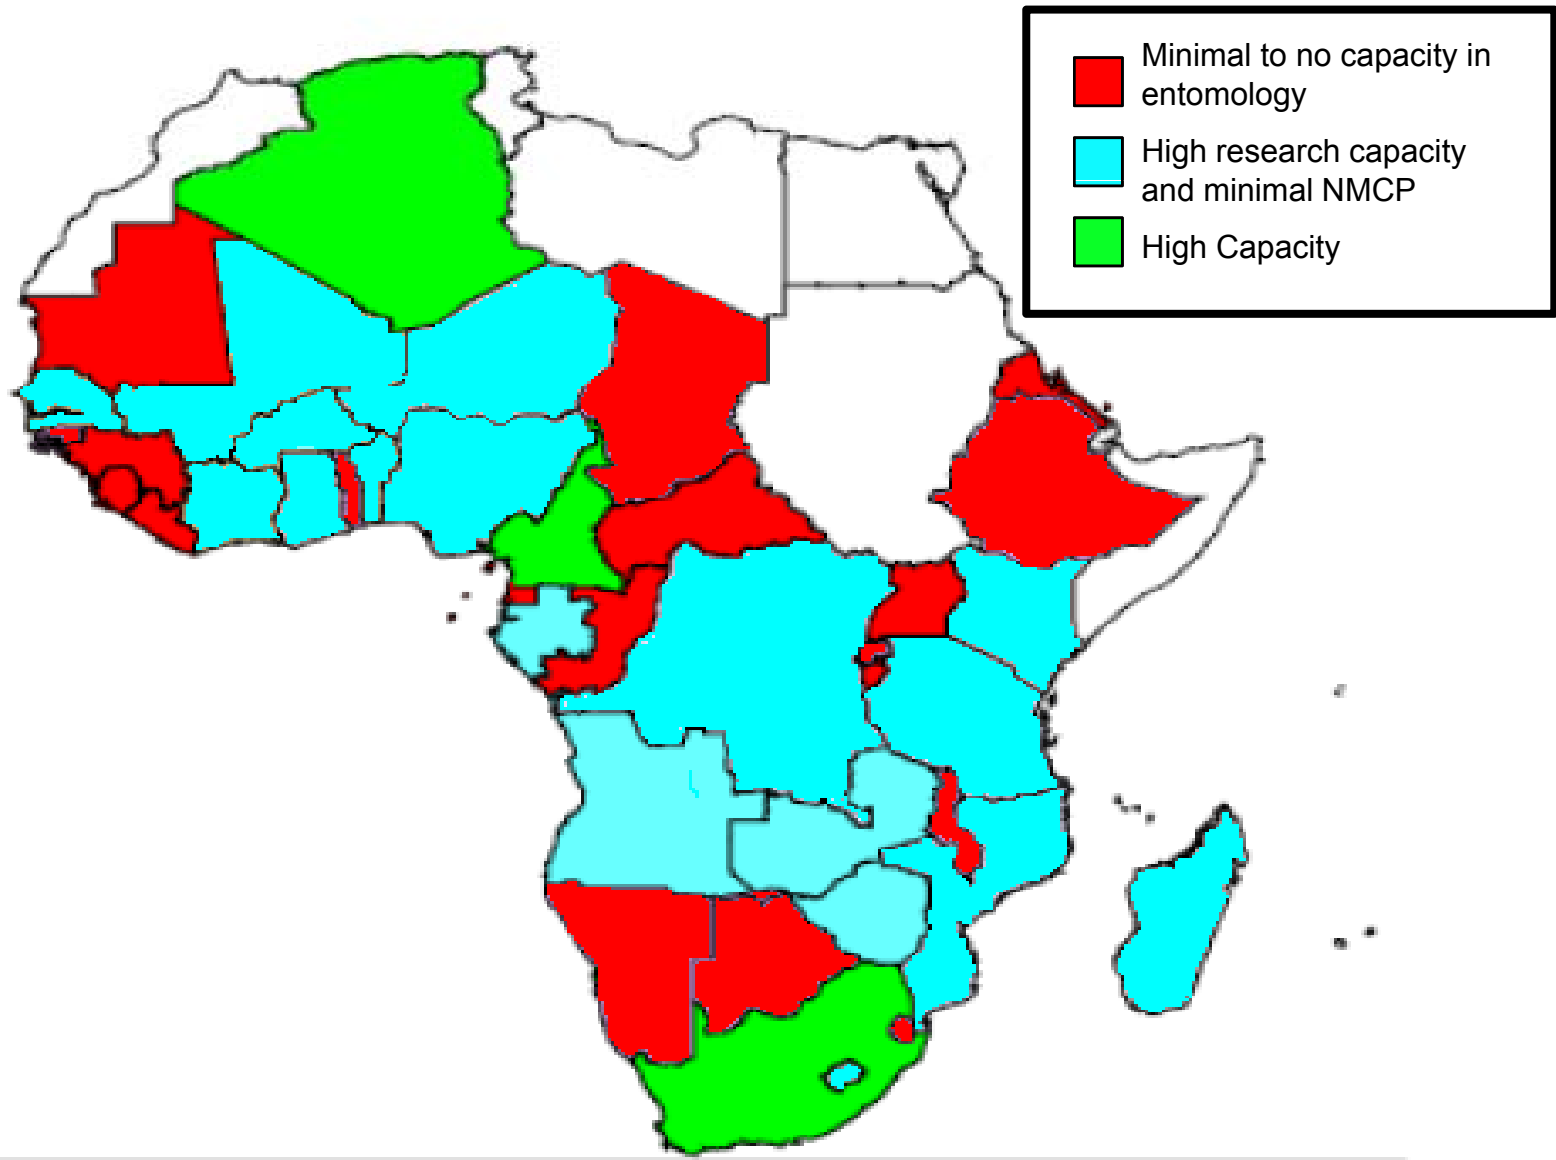

Supplement: MOESM5 [file 9549204]
